# Supplementary material for: Whole-body PET tracking of a d-dodecapeptide and its radiotheranostic potential for PD-L1 overexpressing tumors
Source: PubMed Central journal article supplement — Acta Pharm Sin B. 2021 Sep 22;12(3):1363–76. doi: 10.1016/j.apsb.2021.09.016 (PMC9069398; doi:10.1016/j.apsb.2021.09.016), 2021-09-22

## Supporting Information for

### Original article

## Whole-body PET tracking of a D-dodecapeptide and its radiotheranostic potential for PD-L1 overexpressing tumors

Kuan Hu<sup>a,†</sup>, Wenyu Wu<sup>b,†</sup>, Lin Xie<sup>a</sup>, Hao Geng<sup>c</sup>, Yiding Zhang<sup>a</sup>, Masayuki Hanyu<sup>a</sup>, Lulu Zhang<sup>a</sup>, Yinghuan Liu<sup>c</sup>, Kotaro Nagatsu<sup>a</sup>, Hisashi Suzuki<sup>a</sup>, Jialin Guo<sup>f</sup>, Yundong Wu<sup>c,e,\*</sup>, Zigang Li<sup>c,d,\*</sup>, Feng Wang<sup>b,\*</sup>, Mingrong Zhang<sup>a,\*</sup>

<sup>a</sup>*Department of Advanced Nuclear Medicine Sciences, National Institute of Radiological Sciences, National Institutes for Quantum and Radiological Science and Technology, Chiba 263-8555, Japan*

<sup>b</sup>*Department of Nuclear Medicine, Nanjing First Hospital, Nanjing Medical University, Nanjing 210006, China*

<sup>c</sup>*State Key Laboratory of Chemical Oncogenomics, the School of Chemical Biology and Biotechnology, Peking University, Shenzhen Graduate School, Shenzhen 518055, China*

<sup>d</sup>*Pingshan Translational Medicine Center, Shenzhen Bay Laboratory, Shenzhen 518118, China*

<sup>e</sup>*Institute of Chemical Biology, Shenzhen Bay Laboratory, Shenzhen 518038, China*

<sup>f</sup>*Rensselaer Polytechnic Institute, Troy, NY 12180, USA*

<sup>†</sup>These authors made equal contributions to this work.

Received 13 July 2021; received in revised form 2 September 2021; accepted 14 September 2021

\*Corresponding authors. Tel./fax: +81 43 3823709 (Mingrong Zhang), +86 25 52271455 (Feng Wang), +86 755 26033616 (Zigang Li), +86 755 26611113 (Yundong Wu).

E-mail addresses: [wuyd@pkusz.edu.cn](mailto:wuyd@pkusz.edu.cn) (Yundong Wu), [lizg@pkusz.edu.cn](mailto:lizg@pkusz.edu.cn) (Zigang Li), [fengwangcn@hotmail.com](mailto:fengwangcn@hotmail.com) (Feng Wang), [zhang.ming-rong@qst.go.jp](mailto:zhang.ming-rong@qst.go.jp) (Mingrong Zhang).

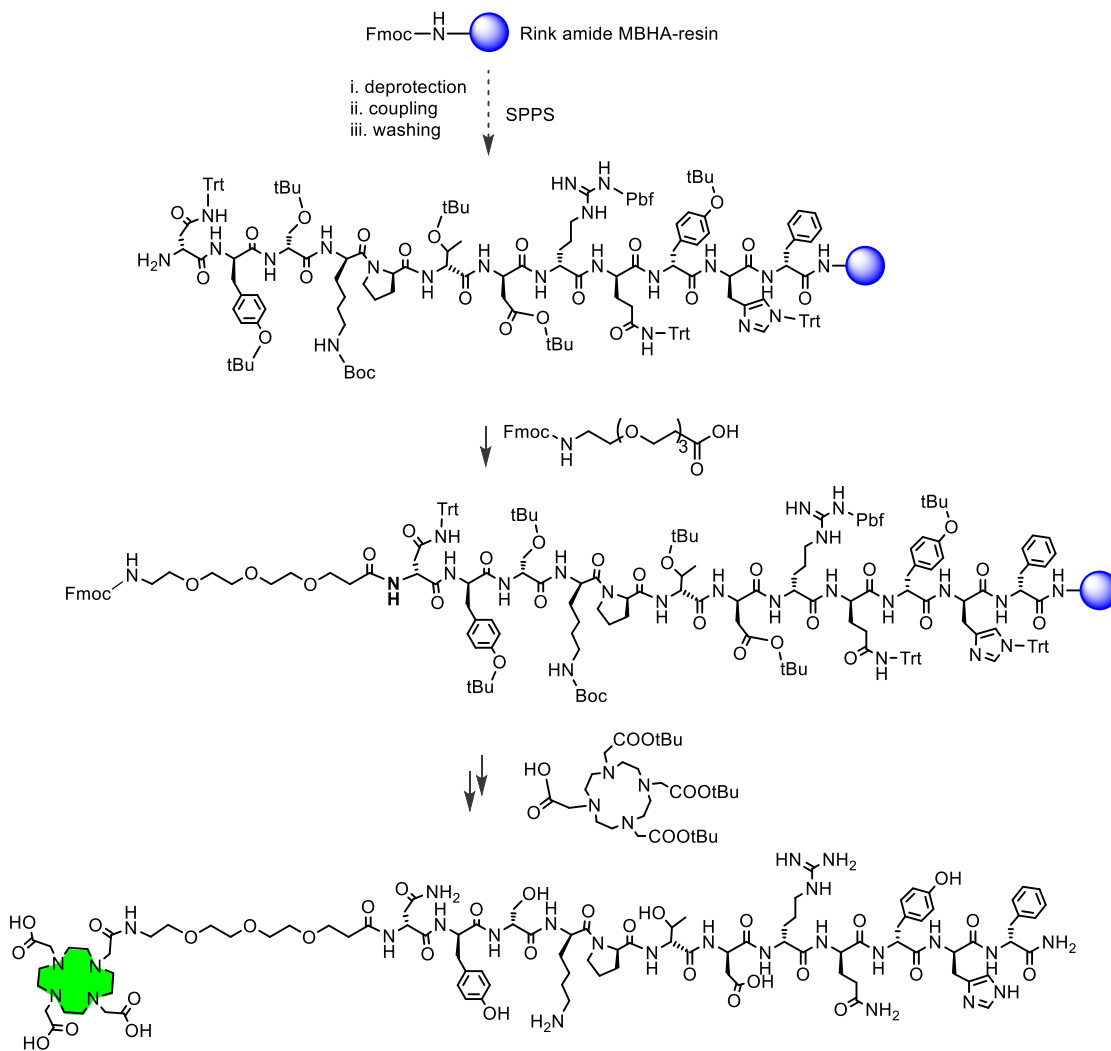

**Scheme S1** Fmoc-based solid-phase peptide synthesis of DPA-DOTA.

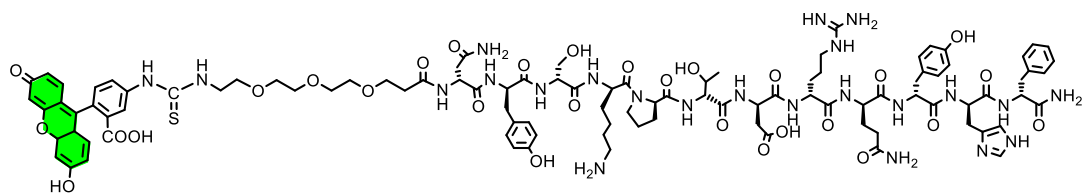

**Scheme S2** Chemical structure of FITC-DPA.

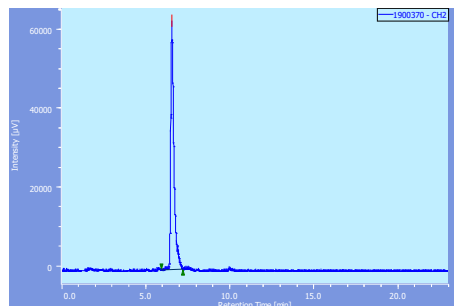

**Figure S1** HPLC spectrum of [ $^{64}\text{Cu}$ ]DPA after 24 h incubation in mouse serum.

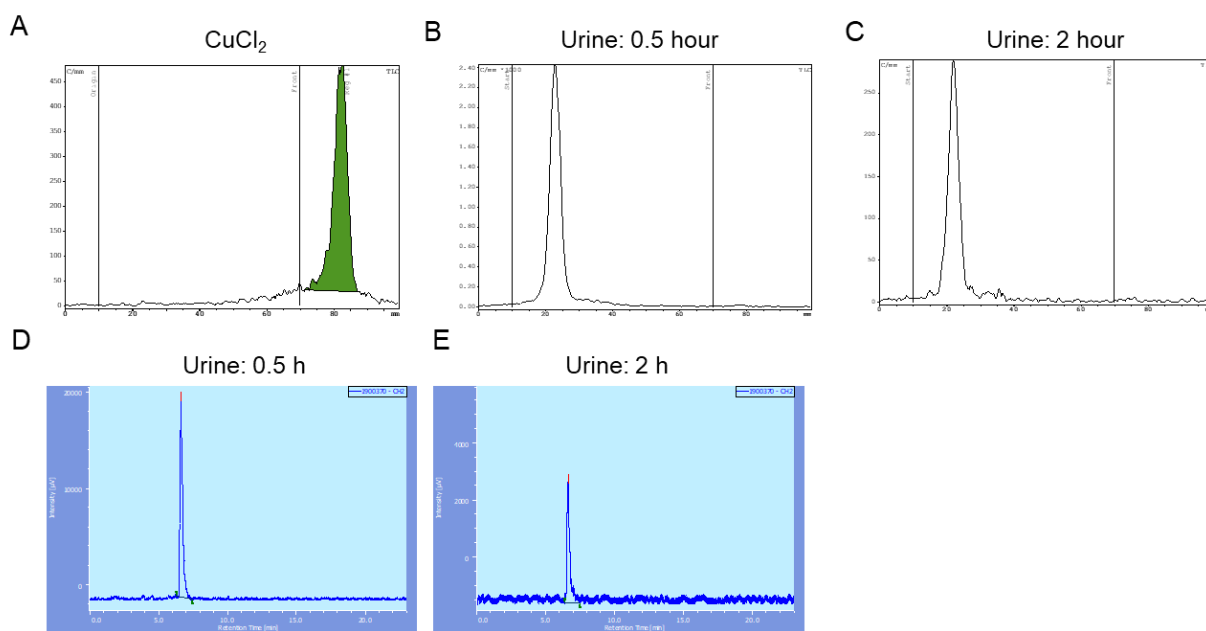

**Figure S2** Metabolite study of [ $^{64}\text{Cu}$ ]DPA. (A) Radio TLC curve of  $^{64}\text{CuCl}_2$ . (B and C) Radio TLC curves of mouse urine samples that were collected at 0.5 and 2 h after intravenous injection of [ $^{64}\text{Cu}$ ]DPA. (D and E) HPLC spectra of mouse urine samples that were collected at 0.5 and 2 h after intravenous injection of [ $^{64}\text{Cu}$ ]DPA.

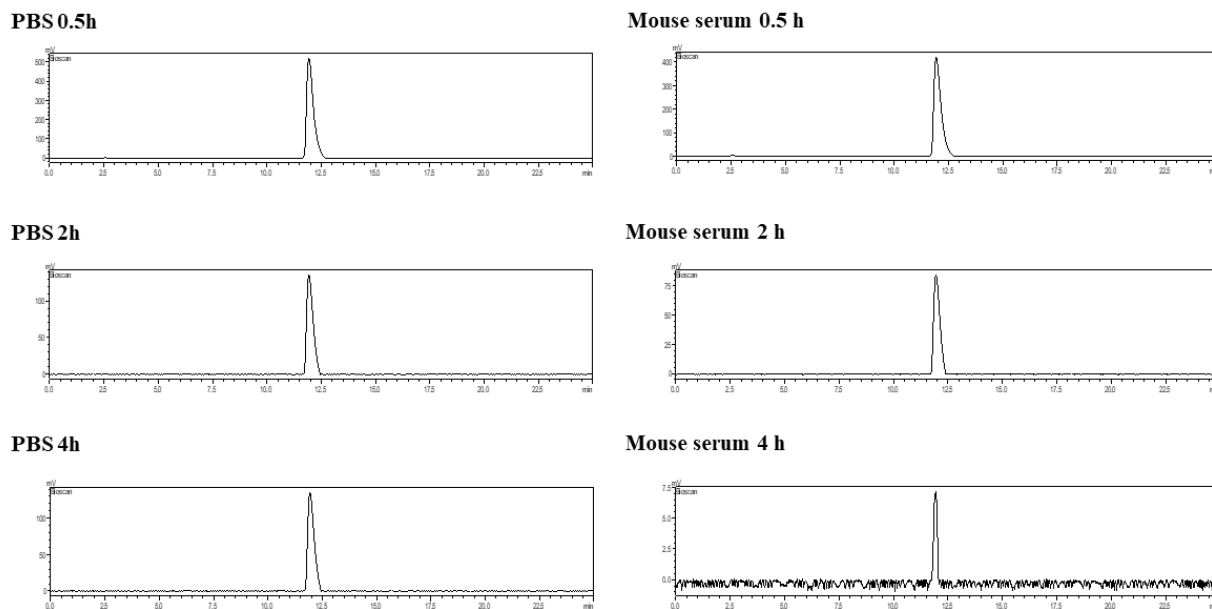

**Figure S3** HPLC curves of [<sup>68</sup>Ga]DPA after incubation for 0.5, 2, and 4 h in PBS or mouse serum.

**Table S1.** Radiolabeling and quality control of [<sup>64</sup>Cu]DPA and [<sup>68</sup>Ga]DPA. Radiochemical yield (RCY), molar activity, and radiochemical purity of the as-prepared tracers. Data represent mean SD (*n* = 7).

| Tracers                                            | [ <sup>64</sup> Cu]DPA | [ <sup>68</sup> Ga]DPA |
|----------------------------------------------------|------------------------|------------------------|
| Radiochemical yield (%)                            | >99                    | >95                    |
| Molar activity (GBq μmol <sup>-1</sup> )           | 74 ± 5                 | 37 ± 8                 |
| Radiochemical purity <sup>a</sup> (%) <sup>a</sup> | >95                    | >95                    |

<sup>a</sup>The radiochemical purity was determined by HPLC under conditions as follows: YMC-Triat-C18 column (4.6 mm i.d. 150 mm, 5 mm); solvent gradient of 10%–90% acetonitrile (0.1% trifluoroacetic acid (TFA)), 20 min; flow rate of 1 mL/min.

**Table S2** Biodistribution of [<sup>64</sup>Cu]DPA at 20, 40, 60, and 80 min after i.v. injection (*n* = 3 per time point) in C57BL/6J mice.

|       | [ <sup>64</sup> Cu]DPA |             |             |             |
|-------|------------------------|-------------|-------------|-------------|
|       | 20 min                 | 40 min      | 60 min      | 80 min      |
| Blood | 2.34 ± 0.38            | 0.97 ± 0.13 | 0.20 ± 0.01 | 0.14 ± 0.03 |
| Heart | 0.81 ± 0.15            | 0.56 ± 0.14 | 0.21 ± 0.02 | 0.18 ± 0.01 |
| Lung  | 1.78 ± 0.29            | 1.31 ± 0.07 | 0.78 ± 0.06 | 0.75 ± 0.02 |

|                |              |              |              |              |
|----------------|--------------|--------------|--------------|--------------|
| Thymus         | 0.72 ± 0.17  | 0.78 ± 0.47  | 0.17 ± 0.01  | 0.15 ± 0.01  |
| Liver          | 1.40 ± 0.19  | 1.44 ± 0.06  | 1.29 ± 0.11  | 1.29 ± 0.08  |
| Pancreas       | 0.51 ± 0.08  | 0.33 ± 0.01  | 0.22 ± 0.05  | 0.19 ± 0.04  |
| Spleen         | 0.63 ± 0.16  | 1.27 ± 1.32  | 0.17 ± 0.01  | 0.17 ± 0.03  |
| Kidney         | 28.64 ± 3.04 | 29.31 ± 1.05 | 24.42 ± 0.50 | 28.52 ± 3.22 |
| Stomach        | 1.15 ± 0.71  | 1.07 ± 0.44  | 0.49 ± 0.10  | 0.62 ± 0.24  |
| S. intestine   | 1.36 ± 0.36  | 1.32 ± 0.23  | 0.89 ± 0.08  | 0.82 ± 0.10  |
| Int. lym. node | 3.90 ± 0.23  | 0.87 ± 0.05  | 0.59 ± 0.46  | 0.39 ± 0.15  |
| Muscle         | 0.90 ± 0.30  | 0.32 ± 0.02  | 0.23 ± 0.16  | 0.15 ± 0.11  |
| Bone           | 1.08 ± 0.57  | 0.36 ± 0.08  | 0.41 ± 0.18  | 0.19 ± 0.02  |
| Testis         | 0.66 ± 0.05  | 0.30 ± 0.01  | 0.12 ± 0.01  | 0.14 ± 0.05  |
| Brain          | 0.11 ± 0.02  | 0.05 ± 0.01  | 0.04 ± 0.01  | 0.02 ± 0.00  |

**Table S3** Biodistribution of [<sup>68</sup>Ga]DPA at 5, 30, 60, and 120 min after i.v. injection (*n* = 3 per time point) in BALB/c nude mice bearing U87MG tumors.

|            | [ <sup>68</sup> Ga]DPA |              |              |             |
|------------|------------------------|--------------|--------------|-------------|
|            | 5 min                  | 30 min       | 60 min       | 120 min     |
| blood      | 3.89 ± 0.43            | 1.55 ± 1.07  | 0.11 ± 0.02  | 0.05 ± 0.01 |
| heart      | 1.19 ± 0.39            | 0.52 ± 0.33  | 0.06 ± 0.02  | 0.05 ± 0.02 |
| liver      | 1.06 ± 0.26            | 0.59 ± 0.43  | 0.19 ± 0.02  | 0.16 ± 0.04 |
| spleen     | 0.98 ± 0.14            | 0.68 ± 0.67  | 0.14 ± 0.06  | 0.09 ± 0.03 |
| lung       | 1.64 ± 0.42            | 1.03 ± 0.90  | 0.13 ± 0.05  | 0.09 ± 0.02 |
| kidney     | 19.23 ± 1.95           | 16.13 ± 1.51 | 11.50 ± 0.44 | 5.20 ± 0.31 |
| stomach    | 1.54 ± 0.10            | 0.61 ± 0.35  | 0.08 ± 0.01  | 0.08 ± 0.03 |
| intestinal | 0.72 ± 0.27            | 0.47 ± 0.35  | 0.08 ± 0.02  | 0.06 ± 0.03 |
| pancreas   | 1.88 ± 0.28            | 0.77 ± 0.75  | 0.16 ± 0.03  | 0.13 ± 0.03 |
| muscle     | 2.21 ± 0.27            | 0.71 ± 0.37  | 0.18 ± 0.02  | 0.14 ± 0.04 |
| bone       | 2.18 ± 0.11            | 0.85 ± 0.51  | 0.26 ± 0.09  | 0.14 ± 0.06 |
| brain      | 0.19 ± 0.04            | 0.11 ± 0.08  | 0.03 ± 0.01  | 0.02 ± 0.01 |
| tumor      | 4.50 ± 0.32            | 3.77 ± 0.27  | 2.99 ± 0.03  | 0.89 ± 0.19 |
| fat        | 2.09 ± 0.49            | 0.81 ± 0.12  | 0.27 ± 0.07  | 0.10 ± 0.07 |

### Mass spectrum of DOTA-DPA.

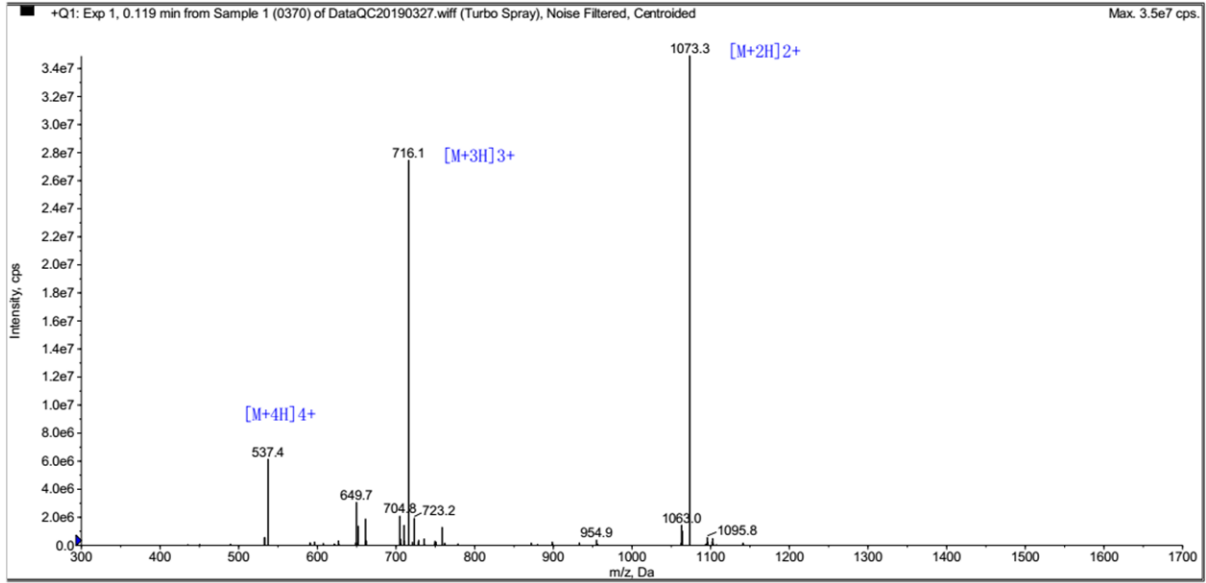

### HPLC curve of DOTA-DPA.

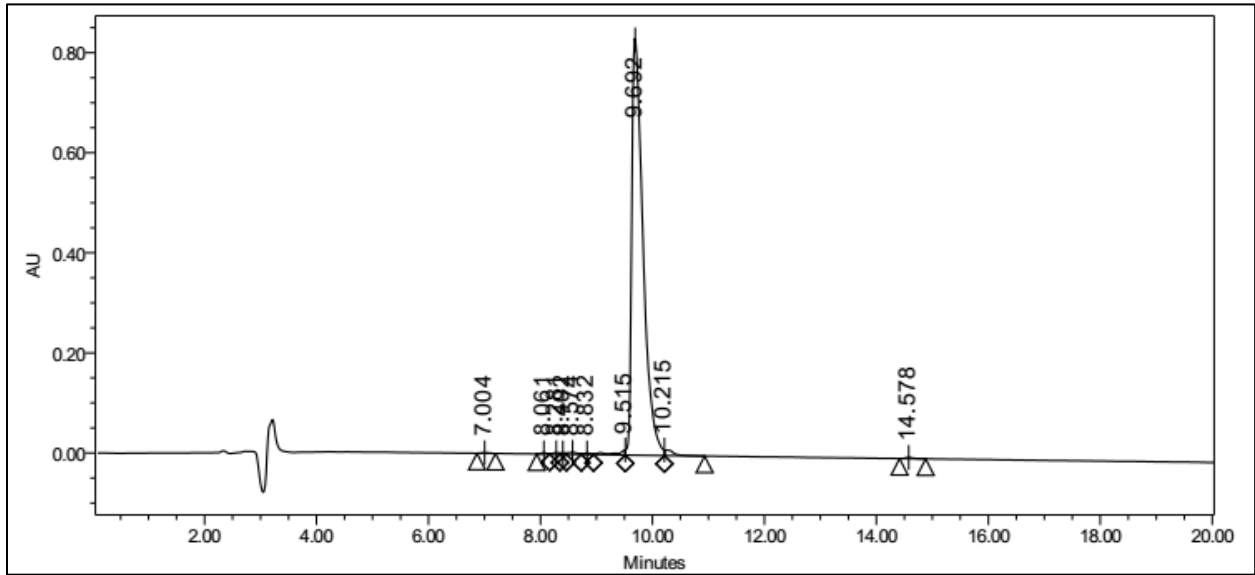

Supplement: mmc1.pdf [file mmc1.pdf]
